# Supplementary material
Source: publisher site journal article supplement (https://www.spandidos-publications.com/7873/downloadSupplementary)
Supplement: Supplementary file 1 [file downloadSupplementary]

## Sheet: Table SXI
Table SXI. 24 FDA approved sensitive drugs and sensitivity related to EFNA3 expression in the CTRP database.
Symbol	Drug	Correlation, r
EFNA3	Alpelisib	-0.156656
EFNA3	Itraconazole	-0.12815
EFNA3	Tirbanibulin	-0.0920949
EFNA3	Afatinib	-0.211858
EFNA3	Belinostat	-0.146287
EFNA3	Bosutinib	-0.0997641
EFNA3	Cabozantinib	0.132883
EFNA3	Ciclopirox	-0.102267
EFNA3	Cytarabine hydrochloride	-0.077693
EFNA3	Dasatinib	0.11208
EFNA3	Erlotinib	-0.145395
EFNA3	Fluorouracil	-0.148054
EFNA3	Fluvastatin	0.158671
EFNA3	Gefitinib	-0.147915
EFNA3	Ibrutinib	-0.25014
EFNA3	Lapatinib	-0.23115
EFNA3	Lovastatin	0.153037
EFNA3	Neratinib	-0.166158
EFNA3	Paclitaxel	-0.107486
EFNA3	Panobinostat	-0.128359
EFNA3	Tivozanib	0.103016
EFNA3	Valdecoxib	-0.158339
EFNA3	Vincristine	-0.10438
EFNA3	Vorinostat	-0.140773

## Sheet: Table SXII
Table XII. FDA approved sensitive drugs and sensitivity related to EFNA3 expression in the GDSC database.
Symbol	Drug	Correlation, r	FDR	Entrez
EFNA3	Ponatinib	0.10131	0.00948878	1944
EFNA3	Afatinib	-0.106511	0.00310556	1944
EFNA3	Bleomycin (50 uM)	0.104189	0.00361408	1944
EFNA3	Bortezomib	0.219844	0.00047515	1944
EFNA3	Idelalisib	0.0741939	0.0481	1944
EFNA3	Dabrafenib	0.140639	0.000249791	1944
EFNA3	Dasatinib	0.180756	0.00279588	1944
EFNA3	Midostaurin	0.0947005	0.0226964	1944
EFNA3	Sunitinib	0.131323	0.0473246	1944
EFNA3	Temsirolimus	0.0974083	0.0239744	1944
EFNA3	Trametinib	0.142449	6.709e-05	1944
EFNA3	Vinblastine	0.113625	0.00493116	1944
EFNA3	Cabozantinib	0.0859967	0.0431725	1944
EFNA3	Selumetinib	0.118868	0.000842075	1944
